# Supplementary material for: Analysis of metabolic disturbances attributable to sepsis-induced myocardial dysfunction using metabolomics and transcriptomics techniques
Source: Front Mol Biosci. 2022 Aug 15;9:967397. doi: 10.3389/fmolb.2022.967397 (PMC9421372; doi:10.3389/fmolb.2022.967397)
Supplement: Supplementary file 9 [file Table7.XLSX]

## Sheet: Sheet1
MetabolicsCompoundID	ProteinID	MetabolicsDescription	EC	KO
C16526	ENSMUSG00000025287	Eicosenoic acid	3.1.2.-	K17361
C16526	ENSMUSG00000043487	Eicosenoic acid	3.1.2.-	K11993
C16526	ENSMUSG00000034853	Eicosenoic acid	3.1.2.-	K12417
C00043	ENSMUSG00000022686	Udp-n-acetylglucosamine	2.4.1.206	K03766
C00043	ENSMUSG00000043998	Udp-n-acetylglucosamine	2.4.1.143	K00736
C00043	ENSMUSG00000036155	Udp-n-acetylglucosamine	2.4.1.155	K00744
C00043	ENSMUSG00000038843	Udp-n-acetylglucosamine	2.4.1.102	K00727
C00043	ENSMUSG00000028671	Udp-n-acetylglucosamine	5.1.3.2	K01784
C00043	ENSMUSG00000022367	Udp-n-acetylglucosamine	2.4.1.212	K00752
C00043	ENSMUSG00000003665	Udp-n-acetylglucosamine	2.4.1.212	K00752
C00043	ENSMUSG00000035245	Udp-n-acetylglucosamine	2.4.1.255	K18134
C00043	ENSMUSG00000034160	Udp-n-acetylglucosamine	2.4.1.255	K09667
C00043	ENSMUSG00000042428	Udp-n-acetylglucosamine	2.4.1.144	K00737
C00043	ENSMUSG00000031286	Udp-n-acetylglucosamine	2.4.1.141	K07432
C00043	ENSMUSG00000066235	Udp-n-acetylglucosamine	2.4.1.312	K18207
C00043	ENSMUSG00000051650	Udp-n-acetylglucosamine	2.4.1.149	K00741
C00043	ENSMUSG00000021360	Udp-n-acetylglucosamine	2.4.1.150	K00742
C00043	ENSMUSG00000028838	Udp-n-acetylglucosamine	2.4.1.224	K02368
C00043	ENSMUSG00000035311	Udp-n-acetylglucosamine	2.7.8.17	K08239
C00043	ENSMUSG00000046152	Udp-n-acetylglucosamine	2.4.1.-	K09669
C00043	ENSMUSG00000034064	Udp-n-acetylglucosamine	2.4.1.-	K13667
C00043	ENSMUSG00000043257	Udp-n-acetylglucosamine	2.4.1.-	K07542
C00043	ENSMUSG00000017929	Udp-n-acetylglucosamine	2.4.1.-	K09905
C00043	ENSMUSG00000039357	Udp-n-acetylglucosamine	2.4.1.-	K11257
C00043	ENSMUSG00000050229	Udp-n-acetylglucosamine	2.4.1.-	K05284
C00043	ENSMUSG00000049307	Udp-n-acetylglucosamine	2.4.1.-	K07632
C00043	ENSMUSG00000045625	Udp-n-acetylglucosamine	2.4.1.-	K08098
C00043	ENSMUSG00000059479	Udp-n-acetylglucosamine	2.4.1.-	K09665
C00043	ENSMUSG00000091387	Udp-n-acetylglucosamine	2.4.1.-	K09663
C01220	ENSMUSG00000026102	D-myo-inositol-1,4-diphosphate	3.1.3.57	K01107
C01220	ENSMUSG00000016933	D-myo-inositol-1,4-diphosphate	3.1.4.11	K01116
C01220	ENSMUSG00000020937	D-myo-inositol-1,4-diphosphate	3.1.4.11	K05857
C01220	ENSMUSG00000024960	D-myo-inositol-1,4-diphosphate	3.1.4.11	K05858
C01220	ENSMUSG00000034330	D-myo-inositol-1,4-diphosphate	3.1.4.11	K05859
C01220	ENSMUSG00000029055	D-myo-inositol-1,4-diphosphate	3.1.4.11	K19006
C01220	ENSMUSG00000051177	D-myo-inositol-1,4-diphosphate	3.1.4.11	K05858
C01220	ENSMUSG00000024998	D-myo-inositol-1,4-diphosphate	3.1.4.11	K05860
C00570	ENSMUSG00000075703	Cdp-ethanolamine	2.7.8.1	K00993
C00570	ENSMUSG00000028414	Cdp-ethanolamine	2.7.8.-	K19872
C00570	ENSMUSG00000025894	Cdp-ethanolamine	2.7.8.-	K06133
C00570	ENSMUSG00000025137	Cdp-ethanolamine	2.7.7.14	K00967
C00092	ENSMUSG00000000628	D-glucose 6-phosphate	2.7.1.1	K00844
C00092	ENSMUSG00000025877	D-glucose 6-phosphate	2.7.1.1	K00844
C00092	ENSMUSG00000036427	D-glucose 6-phosphate	5.3.1.9	K01810
C00092	ENSMUSG00000041798	D-glucose 6-phosphate	2.7.1.2	K12407
C00092	ENSMUSG00000025236	D-glucose 6-phosphate	2.7.1.147	K08074
C08316	ENSMUSG00000025287	Erucic acid	3.1.2.-	K17361
C08316	ENSMUSG00000043487	Erucic acid	3.1.2.-	K11993
C08316	ENSMUSG00000034853	Erucic acid	3.1.2.-	K12417
C00117	ENSMUSG00000009292	D-Ribose 5-phosphate	3.6.1.13	K04977
C00117	ENSMUSG00000053604	D-Ribose 5-phosphate	5.3.1.6	K01807
C00117	ENSMUSG00000029136	D-Ribose 5-phosphate	2.7.1.15	K00852
C00117	ENSMUSG00000022538	D-Ribose 5-phosphate	3.6.1.-	K14539
C00117	ENSMUSG00000059772	D-Ribose 5-phosphate	3.6.1.-	K15078
C00117	ENSMUSG00000022360	D-Ribose 5-phosphate	3.6.1.-	K22531
C00117	ENSMUSG00000013662	D-Ribose 5-phosphate	3.6.1.-	K22530
C00117	ENSMUSG00000031767	D-Ribose 5-phosphate	3.6.1.-	K17879
C00117	ENSMUSG00000074797	D-Ribose 5-phosphate	3.6.1.-	K01519
C00117	ENSMUSG00000025742	D-Ribose 5-phosphate	2.7.6.1	K00948
C00275	ENSMUSG00000022474	D-mannose 6-phosphate	5.4.2.8	K17497
C00275	ENSMUSG00000032306	D-mannose 6-phosphate	5.3.1.8	K01809
C00275	ENSMUSG00000000628	D-mannose 6-phosphate	2.7.1.1	K00844
C00275	ENSMUSG00000025877	D-mannose 6-phosphate	2.7.1.1	K00844
C00279	ENSMUSG00000028307	D-erythrose 4-phosphate	4.1.2.13	K01623
C00008	ENSMUSG00000038128	Adenosine 5'-diphosphate	2.7.11.17	K05869
C00008	ENSMUSG00000024617	Adenosine 5'-diphosphate	2.7.11.17	K04515
C00008	ENSMUSG00000029471	Adenosine 5'-diphosphate	2.7.11.17	K07359
C00008	ENSMUSG00000053819	Adenosine 5'-diphosphate	2.7.11.17	K04515
C00008	ENSMUSG00000075289	Adenosine 5'-diphosphate	6.3.2.11	K14755
C00008	ENSMUSG00000021196	Adenosine 5'-diphosphate	2.7.1.11	K00850
C00008	ENSMUSG00000025178	Adenosine 5'-diphosphate	2.7.1.67	K13711
C00008	ENSMUSG00000063179	Adenosine 5'-diphosphate	2.7.1.164	K10837
C00008	ENSMUSG00000028633	Adenosine 5'-diphosphate	6.3.4.2	K01937
C00008	ENSMUSG00000032599	Adenosine 5'-diphosphate	2.7.4.21	K07756
C00008	ENSMUSG00000032594	Adenosine 5'-diphosphate	2.7.4.21	K07756
C00008	ENSMUSG00000029916	Adenosine 5'-diphosphate	2.7.1.94	K09881
C00008	ENSMUSG00000041798	Adenosine 5'-diphosphate	2.7.1.2	K12407
C00008	ENSMUSG00000052920	Adenosine 5'-diphosphate	2.7.11.12	K07376
C00008	ENSMUSG00000031392	Adenosine 5'-diphosphate	2.7.11.1	K04730
C00008	ENSMUSG00000024948	Adenosine 5'-diphosphate	2.7.11.1	K04414
C00008	ENSMUSG00000031016	Adenosine 5'-diphosphate	2.7.11.1	K06632
C00008	ENSMUSG00000024006	Adenosine 5'-diphosphate	2.7.11.1	K08790
C00008	ENSMUSG00000022263	Adenosine 5'-diphosphate	2.7.11.1	K08810
C00008	ENSMUSG00000074923	Adenosine 5'-diphosphate	2.7.11.1	K05735
C00008	ENSMUSG00000002007	Adenosine 5'-diphosphate	2.7.11.1	K08832
C00008	ENSMUSG00000020227	Adenosine 5'-diphosphate	2.7.11.1	K04732
C00008	ENSMUSG00000012519	Adenosine 5'-diphosphate	2.7.11.1	K08849
C00008	ENSMUSG00000009681	Adenosine 5'-diphosphate	2.7.11.1	K08878
C00008	ENSMUSG00000020694	Adenosine 5'-diphosphate	2.7.11.1	K08864
C00008	ENSMUSG00000061462	Adenosine 5'-diphosphate	2.7.11.1	K17531
C00008	ENSMUSG00000020190	Adenosine 5'-diphosphate	2.7.11.1	K04372
C00008	ENSMUSG00000021413	Adenosine 5'-diphosphate	2.7.11.1	K08827
C00008	ENSMUSG00000034135	Adenosine 5'-diphosphate	2.7.11.1	K19009
C00008	ENSMUSG00000031012	Adenosine 5'-diphosphate	2.7.11.1	K06103
C00008	ENSMUSG00000025162	Adenosine 5'-diphosphate	2.7.11.1	K08959
C00008	ENSMUSG00000026393	Adenosine 5'-diphosphate	2.7.11.1	K20876
C00008	ENSMUSG00000021428	Adenosine 5'-diphosphate	2.7.11.1	K07178
C00008	ENSMUSG00000061436	Adenosine 5'-diphosphate	2.7.11.1	K08826
C00008	ENSMUSG00000026207	Adenosine 5'-diphosphate	2.7.11.1	K08809
C00008	ENSMUSG00000029512	Adenosine 5'-diphosphate	2.7.11.1	K21357
C00008	ENSMUSG00000004798	Adenosine 5'-diphosphate	2.7.11.1	K08269
C00008	ENSMUSG00000023809	Adenosine 5'-diphosphate	2.7.11.1	K04373
C00008	ENSMUSG00000019970	Adenosine 5'-diphosphate	2.7.11.1	K13302
C00008	ENSMUSG00000026620	Adenosine 5'-diphosphate	2.7.11.1	K08798
C00008	ENSMUSG00000026074	Adenosine 5'-diphosphate	2.7.11.1	K04407
C00008	ENSMUSG00000024576	Adenosine 5'-diphosphate	2.7.11.1	K08957
C00008	ENSMUSG00000037885	Adenosine 5'-diphosphate	2.7.11.1	K08859
C00008	ENSMUSG00000007591	Adenosine 5'-diphosphate	2.7.11.1	K08811
C00008	ENSMUSG00000042978	Adenosine 5'-diphosphate	2.7.11.1	K08858
C00008	ENSMUSG00000015981	Adenosine 5'-diphosphate	2.7.11.1	K08793
C00008	ENSMUSG00000000441	Adenosine 5'-diphosphate	2.7.11.1	K04366
C00008	ENSMUSG00000035032	Adenosine 5'-diphosphate	2.7.11.1	K20880
C00008	ENSMUSG00000020451	Adenosine 5'-diphosphate	2.7.11.1	K05744
C00008	ENSMUSG00000061207	Adenosine 5'-diphosphate	2.7.11.1	K08880
C00008	ENSMUSG00000021408	Adenosine 5'-diphosphate	2.7.11.1	K02861
C00008	ENSMUSG00000022221	Adenosine 5'-diphosphate	2.7.11.1	K08847
C00008	ENSMUSG00000032577	Adenosine 5'-diphosphate	2.7.11.1	K04444
C00008	ENSMUSG00000032113	Adenosine 5'-diphosphate	2.7.11.1	K02216
C00008	ENSMUSG00000042608	Adenosine 5'-diphosphate	2.7.11.1	K16312
C00008	ENSMUSG00000001630	Adenosine 5'-diphosphate	2.7.11.1	K08790
C00008	ENSMUSG00000024404	Adenosine 5'-diphosphate	2.7.11.1	K08872
C00008	ENSMUSG00000022672	Adenosine 5'-diphosphate	2.7.11.1	K06642
C00008	ENSMUSG00000037989	Adenosine 5'-diphosphate	2.7.11.1	K08867
C00008	ENSMUSG00000027692	Adenosine 5'-diphosphate	2.7.11.1	K08840
C00008	ENSMUSG00000024079	Adenosine 5'-diphosphate	2.7.11.1	K16195
C00008	ENSMUSG00000040086	Adenosine 5'-diphosphate	2.7.11.1	K17535
C00008	ENSMUSG00000038145	Adenosine 5'-diphosphate	2.7.11.1	K08802
C00008	ENSMUSG00000027030	Adenosine 5'-diphosphate	2.7.11.1	K08835
C00008	ENSMUSG00000024769	Adenosine 5'-diphosphate	2.7.11.1	K16307
C00008	ENSMUSG00000021115	Adenosine 5'-diphosphate	2.7.11.1	K08816
C00008	ENSMUSG00000029674	Adenosine 5'-diphosphate	2.7.11.1	K05743
C00008	ENSMUSG00000032380	Adenosine 5'-diphosphate	2.7.11.1	K08803
C00008	ENSMUSG00000022433	Adenosine 5'-diphosphate	2.7.11.1	K08960
C00008	ENSMUSG00000025915	Adenosine 5'-diphosphate	2.7.11.1	K13304
C00008	ENSMUSG00000027365	Adenosine 5'-diphosphate	2.7.11.1	K04982
C00008	ENSMUSG00000027797	Adenosine 5'-diphosphate	2.7.11.1	K08805
C00008	ENSMUSG00000034751	Adenosine 5'-diphosphate	2.7.11.1	K08789
C00008	ENSMUSG00000031309	Adenosine 5'-diphosphate	2.7.11.1	K04373
C00008	ENSMUSG00000029521	Adenosine 5'-diphosphate	2.7.11.1	K06641
C00008	ENSMUSG00000040021	Adenosine 5'-diphosphate	2.7.11.1	K08791
C00008	ENSMUSG00000022781	Adenosine 5'-diphosphate	2.7.11.1	K04410
C00008	ENSMUSG00000029123	Adenosine 5'-diphosphate	2.7.11.1	K08793
C00008	ENSMUSG00000062234	Adenosine 5'-diphosphate	2.7.11.1	K08855
C00008	ENSMUSG00000031833	Adenosine 5'-diphosphate	2.7.11.1	K08789
C00008	ENSMUSG00000032409	Adenosine 5'-diphosphate	2.7.11.1	K06640
C00008	ENSMUSG00000023908	Adenosine 5'-diphosphate	2.7.11.1	K06633
C00008	ENSMUSG00000116564	Adenosine 5'-diphosphate	2.7.11.1	K07179
C00008	ENSMUSG00000095930	Adenosine 5'-diphosphate	2.7.11.1	K16310
C00008	ENSMUSG00000021180	Adenosine 5'-diphosphate	2.7.11.1	K04445
C00008	ENSMUSG00000021559	Adenosine 5'-diphosphate	2.7.11.1	K08803
C00008	ENSMUSG00000024242	Adenosine 5'-diphosphate	2.7.11.1	K04406
C00008	ENSMUSG00000030602	Adenosine 5'-diphosphate	2.7.11.1	K05734
C00008	ENSMUSG00000032308	Adenosine 5'-diphosphate	2.7.11.1	K21358
C00008	ENSMUSG00000041566	Adenosine 5'-diphosphate	2.7.11.1	K08811
C00008	ENSMUSG00000032571	Adenosine 5'-diphosphate	2.7.11.1	K08333
C00008	ENSMUSG00000048310	Adenosine 5'-diphosphate	2.7.11.1	K08808
C00008	ENSMUSG00000021918	Adenosine 5'-diphosphate	2.7.11.1	K08857
C00008	ENSMUSG00000024042	Adenosine 5'-diphosphate	2.7.11.1	K19008
C00008	ENSMUSG00000035683	Adenosine 5'-diphosphate	2.7.11.1	K08799
C00008	ENSMUSG00000024014	Adenosine 5'-diphosphate	2.7.11.1	K04702
C00008	ENSMUSG00000028756	Adenosine 5'-diphosphate	2.7.11.1	K05688
C00008	ENSMUSG00000060477	Adenosine 5'-diphosphate	2.7.11.1	K04731
C00008	ENSMUSG00000053414	Adenosine 5'-diphosphate	2.7.11.1	K08797
C00008	ENSMUSG00000035112	Adenosine 5'-diphosphate	2.7.11.1	K08867
C00008	ENSMUSG00000002205	Adenosine 5'-diphosphate	2.7.11.1	K08816
C00008	ENSMUSG00000035828	Adenosine 5'-diphosphate	2.7.11.1	K08807
C00008	ENSMUSG00000046707	Adenosine 5'-diphosphate	2.7.11.1	K03097
C00008	ENSMUSG00000052854	Adenosine 5'-diphosphate	2.7.11.1	K16313
C00008	ENSMUSG00000041135	Adenosine 5'-diphosphate	2.7.11.1	K08846
C00008	ENSMUSG00000031644	Adenosine 5'-diphosphate	2.7.11.1	K08857
C00008	ENSMUSG00000026749	Adenosine 5'-diphosphate	2.7.11.1	K20875
C00008	ENSMUSG00000026490	Adenosine 5'-diphosphate	2.7.11.1	K16307
C00008	ENSMUSG00000028078	Adenosine 5'-diphosphate	2.7.11.1	K08805
C00008	ENSMUSG00000034663	Adenosine 5'-diphosphate	2.7.11.1	K08854
C00008	ENSMUSG00000057230	Adenosine 5'-diphosphate	2.7.11.1	K08853
C00008	ENSMUSG00000030409	Adenosine 5'-diphosphate	2.7.11.1	K08788
C00008	ENSMUSG00000032500	Adenosine 5'-diphosphate	2.7.11.1	K17530
C00008	ENSMUSG00000009772	Adenosine 5'-diphosphate	2.7.11.1	K08800
C00008	ENSMUSG00000020032	Adenosine 5'-diphosphate	2.7.11.1	K08800
C00008	ENSMUSG00000020580	Adenosine 5'-diphosphate	2.7.11.1	K17388
C00008	ENSMUSG00000005102	Adenosine 5'-diphosphate	2.7.11.1	K16196
C00008	ENSMUSG00000020638	Adenosine 5'-diphosphate	2.7.4.14	K13809
C00008	ENSMUSG00000028719	Adenosine 5'-diphosphate	2.7.4.14	K13800
C00008	ENSMUSG00000027665	Adenosine 5'-diphosphate	2.7.1.153	K00922
C00008	ENSMUSG00000039936	Adenosine 5'-diphosphate	2.7.1.153	K00922
C00008	ENSMUSG00000032462	Adenosine 5'-diphosphate	2.7.1.153	K00922
C00008	ENSMUSG00000031851	Adenosine 5'-diphosphate	3.6.1.15	K06928
C00008	ENSMUSG00000032788	Adenosine 5'-diphosphate	2.7.1.35	K00868
C00008	ENSMUSG00000041650	Adenosine 5'-diphosphate	6.4.1.3	K01965
C00008	ENSMUSG00000025236	Adenosine 5'-diphosphate	2.7.1.147	K08074
C00008	ENSMUSG00000025758	Adenosine 5'-diphosphate	2.7.11.21	K08863
C00008	ENSMUSG00000021701	Adenosine 5'-diphosphate	2.7.11.21	K08861
C00008	ENSMUSG00000028680	Adenosine 5'-diphosphate	2.7.11.21	K08862
C00008	ENSMUSG00000020899	Adenosine 5'-diphosphate	6.3.5.3	K01952
C00008	ENSMUSG00000026575	Adenosine 5'-diphosphate	2.7.4.6	K00940
C00008	ENSMUSG00000024177	Adenosine 5'-diphosphate	2.7.4.6	K00940
C00008	ENSMUSG00000037601	Adenosine 5'-diphosphate	2.7.4.6	K00940
C00008	ENSMUSG00000041440	Adenosine 5'-diphosphate	2.7.1.30	K19583
C00008	ENSMUSG00000025059	Adenosine 5'-diphosphate	2.7.1.30	K00864
C00008	ENSMUSG00000027610	Adenosine 5'-diphosphate	6.3.2.3	K21456
C00008	ENSMUSG00000062070	Adenosine 5'-diphosphate	2.7.2.3	K00927
C00008	ENSMUSG00000020917	Adenosine 5'-diphosphate	2.3.3.8	K01648
C00008	ENSMUSG00000018932	Adenosine 5'-diphosphate	2.7.12.2	K04432
C00008	ENSMUSG00000058444	Adenosine 5'-diphosphate	2.7.12.2	K04463
C00008	ENSMUSG00000033352	Adenosine 5'-diphosphate	2.7.12.2	K04430
C00008	ENSMUSG00000004936	Adenosine 5'-diphosphate	2.7.12.2	K04368
C00008	ENSMUSG00000035027	Adenosine 5'-diphosphate	2.7.12.2	K04369
C00008	ENSMUSG00000020623	Adenosine 5'-diphosphate	2.7.12.2	K04433
C00008	ENSMUSG00000029162	Adenosine 5'-diphosphate	2.7.1.3	K00846
C00008	ENSMUSG00000042688	Adenosine 5'-diphosphate	2.7.11.24	K06855
C00008	ENSMUSG00000046709	Adenosine 5'-diphosphate	2.7.11.24	K04440
C00008	ENSMUSG00000063065	Adenosine 5'-diphosphate	2.7.11.24	K04371
C00008	ENSMUSG00000053137	Adenosine 5'-diphosphate	2.7.11.24	K04441
C00008	ENSMUSG00000004864	Adenosine 5'-diphosphate	2.7.11.24	K04441
C00008	ENSMUSG00000001034	Adenosine 5'-diphosphate	2.7.11.24	K04464
C00008	ENSMUSG00000053436	Adenosine 5'-diphosphate	2.7.11.24	K04441
C00008	ENSMUSG00000022610	Adenosine 5'-diphosphate	2.7.11.24	K04441
C00008	ENSMUSG00000024782	Adenosine 5'-diphosphate	2.7.4.10	K00944
C00008	ENSMUSG00000003752	Adenosine 5'-diphosphate	2.7.1.127	K00911
C00008	ENSMUSG00000021646	Adenosine 5'-diphosphate	6.4.1.4	K01969
C00008	ENSMUSG00000027709	Adenosine 5'-diphosphate	6.4.1.4	K01968
C00008	ENSMUSG00000032547	Adenosine 5'-diphosphate	2.7.10.1	K05128
C00008	ENSMUSG00000029869	Adenosine 5'-diphosphate	2.7.10.1	K05114
C00008	ENSMUSG00000062960	Adenosine 5'-diphosphate	2.7.10.1	K05098
C00008	ENSMUSG00000057280	Adenosine 5'-diphosphate	2.7.10.1	K05129
C00008	ENSMUSG00000023972	Adenosine 5'-diphosphate	2.7.10.1	K05127
C00008	ENSMUSG00000025375	Adenosine 5'-diphosphate	2.7.10.1	K17480
C00008	ENSMUSG00000055254	Adenosine 5'-diphosphate	2.7.10.1	K04360
C00008	ENSMUSG00000002602	Adenosine 5'-diphosphate	2.7.10.1	K05115
C00008	ENSMUSG00000032584	Adenosine 5'-diphosphate	2.7.10.1	K05100
C00008	ENSMUSG00000005640	Adenosine 5'-diphosphate	2.7.10.1	K05086
C00008	ENSMUSG00000006386	Adenosine 5'-diphosphate	2.7.10.1	K05121
C00008	ENSMUSG00000029231	Adenosine 5'-diphosphate	2.7.10.1	K04363
C00008	ENSMUSG00000026235	Adenosine 5'-diphosphate	2.7.10.1	K05105
C00008	ENSMUSG00000054252	Adenosine 5'-diphosphate	2.7.10.1	K05094
C00008	ENSMUSG00000005672	Adenosine 5'-diphosphate	2.7.10.1	K05091
C00008	ENSMUSG00000024621	Adenosine 5'-diphosphate	2.7.10.1	K05090
C00008	ENSMUSG00000024620	Adenosine 5'-diphosphate	2.7.10.1	K05089
C00008	ENSMUSG00000030110	Adenosine 5'-diphosphate	2.7.10.1	K05126
C00008	ENSMUSG00000035305	Adenosine 5'-diphosphate	2.7.10.1	K05122
C00008	ENSMUSG00000014361	Adenosine 5'-diphosphate	2.7.10.1	K05117
C00008	ENSMUSG00000029648	Adenosine 5'-diphosphate	2.7.10.1	K05096
C00008	ENSMUSG00000009376	Adenosine 5'-diphosphate	2.7.10.1	K05099
C00008	ENSMUSG00000005534	Adenosine 5'-diphosphate	2.7.10.1	K04527
C00008	ENSMUSG00000020122	Adenosine 5'-diphosphate	2.7.10.1	K04361
C00008	ENSMUSG00000018166	Adenosine 5'-diphosphate	2.7.10.1	K05084
C00008	ENSMUSG00000028289	Adenosine 5'-diphosphate	2.7.10.1	K05108
C00008	ENSMUSG00000006445	Adenosine 5'-diphosphate	2.7.10.1	K05103
C00008	ENSMUSG00000005958	Adenosine 5'-diphosphate	2.7.10.1	K05112
C00008	ENSMUSG00000005533	Adenosine 5'-diphosphate	2.7.10.1	K05087
C00008	ENSMUSG00000029859	Adenosine 5'-diphosphate	2.7.10.1	K05102
C00008	ENSMUSG00000029710	Adenosine 5'-diphosphate	2.7.10.1	K05113
C00008	ENSMUSG00000028518	Adenosine 5'-diphosphate	2.7.11.11	K07198
C00008	ENSMUSG00000035725	Adenosine 5'-diphosphate	2.7.11.11	K19584
C00008	ENSMUSG00000027952	Adenosine 5'-diphosphate	2.7.4.2	K13273
C00008	ENSMUSG00000025949	Adenosine 5'-diphosphate	2.7.1.150	K00921
C00008	ENSMUSG00000024858	Adenosine 5'-diphosphate	2.7.11.15	K00910
C00008	ENSMUSG00000042046	Adenosine 5'-diphosphate	2.7.12.1	K16288
C00008	ENSMUSG00000002409	Adenosine 5'-diphosphate	2.7.12.1	K08825
C00008	ENSMUSG00000016526	Adenosine 5'-diphosphate	2.7.12.1	K18669
C00008	ENSMUSG00000032316	Adenosine 5'-diphosphate	2.7.12.1	K08823
C00008	ENSMUSG00000028630	Adenosine 5'-diphosphate	2.7.12.1	K18669
C00008	ENSMUSG00000033985	Adenosine 5'-diphosphate	2.7.12.1	K08842
C00008	ENSMUSG00000009566	Adenosine 5'-diphosphate	6.3.2.17	K01930
C00008	ENSMUSG00000035232	Adenosine 5'-diphosphate	2.7.11.2	K00898
C00008	ENSMUSG00000038967	Adenosine 5'-diphosphate	2.7.11.2	K00898
C00008	ENSMUSG00000027079	Adenosine 5'-diphosphate	2.7.1.78	K14399
C00008	ENSMUSG00000031450	Adenosine 5'-diphosphate	2.7.11.14	K00909
C00008	ENSMUSG00000006728	Adenosine 5'-diphosphate	2.7.11.22	K02089
C00008	ENSMUSG00000028926	Adenosine 5'-diphosphate	2.7.11.22	K08821
C00008	ENSMUSG00000056458	Adenosine 5'-diphosphate	2.7.11.22	K08830
C00008	ENSMUSG00000029403	Adenosine 5'-diphosphate	2.7.11.22	K08824
C00008	ENSMUSG00000009828	Adenosine 5'-diphosphate	2.7.11.22	K08828
C00008	ENSMUSG00000031292	Adenosine 5'-diphosphate	2.7.11.22	K08824
C00008	ENSMUSG00000040274	Adenosine 5'-diphosphate	2.7.11.22	K02091
C00008	ENSMUSG00000020990	Adenosine 5'-diphosphate	2.7.11.22	K08824
C00008	ENSMUSG00000020015	Adenosine 5'-diphosphate	2.7.11.22	K15595
C00008	ENSMUSG00000026437	Adenosine 5'-diphosphate	2.7.11.22	K15596
C00008	ENSMUSG00000028969	Adenosine 5'-diphosphate	2.7.11.22	K02090
C00008	ENSMUSG00000029136	Adenosine 5'-diphosphate	2.7.1.15	K00852
C00008	ENSMUSG00000035824	Adenosine 5'-diphosphate	2.7.1.21	K00857
C00008	ENSMUSG00000033703	Adenosine 5'-diphosphate	2.7.1.52	K05305
C00008	ENSMUSG00000024892	Adenosine 5'-diphosphate	6.4.1.1	K01958
C00008	ENSMUSG00000061878	Adenosine 5'-diphosphate	2.7.1.91	K04718
C00008	ENSMUSG00000024383	Adenosine 5'-diphosphate	2.7.11.25	K04420
C00008	ENSMUSG00000071369	Adenosine 5'-diphosphate	2.7.11.25	K04426
C00008	ENSMUSG00000023050	Adenosine 5'-diphosphate	2.7.11.25	K04423
C00008	ENSMUSG00000020941	Adenosine 5'-diphosphate	2.7.11.25	K04466
C00008	ENSMUSG00000028862	Adenosine 5'-diphosphate	2.7.11.25	K04425
C00008	ENSMUSG00000042724	Adenosine 5'-diphosphate	2.7.11.25	K04417
C00008	ENSMUSG00000024235	Adenosine 5'-diphosphate	2.7.11.25	K04415
C00008	ENSMUSG00000004054	Adenosine 5'-diphosphate	2.7.11.25	K04419
C00008	ENSMUSG00000014426	Adenosine 5'-diphosphate	2.7.11.25	K04428
C00008	ENSMUSG00000031853	Adenosine 5'-diphosphate	2.7.11.25	K17534
C00008	ENSMUSG00000033618	Adenosine 5'-diphosphate	2.7.11.25	K04422
C00008	ENSMUSG00000029063	Adenosine 5'-diphosphate	2.7.1.23	K00858
C00008	ENSMUSG00000022253	Adenosine 5'-diphosphate	2.7.1.23	K00858
C00008	ENSMUSG00000042349	Adenosine 5'-diphosphate	2.7.11.10	K07211
C00008	ENSMUSG00000031537	Adenosine 5'-diphosphate	2.7.11.10	K07209
C00008	ENSMUSG00000025199	Adenosine 5'-diphosphate	2.7.11.10	K04467
C00008	ENSMUSG00000020115	Adenosine 5'-diphosphate	2.7.11.10	K05410
C00008	ENSMUSG00000026737	Adenosine 5'-diphosphate	2.7.1.149	K00920
C00008	ENSMUSG00000021457	Adenosine 5'-diphosphate	2.7.10.2	K05855
C00008	ENSMUSG00000032312	Adenosine 5'-diphosphate	2.7.10.2	K05728
C00008	ENSMUSG00000042228	Adenosine 5'-diphosphate	2.7.10.2	K05854
C00008	ENSMUSG00000028530	Adenosine 5'-diphosphate	2.7.10.2	K11217
C00008	ENSMUSG00000054892	Adenosine 5'-diphosphate	2.7.10.2	K08016
C00008	ENSMUSG00000053158	Adenosine 5'-diphosphate	2.7.10.2	K07527
C00008	ENSMUSG00000014932	Adenosine 5'-diphosphate	2.7.10.2	K05705
C00008	ENSMUSG00000000409	Adenosine 5'-diphosphate	2.7.10.2	K05856
C00008	ENSMUSG00000074305	Adenosine 5'-diphosphate	2.7.10.2	K17538
C00008	ENSMUSG00000032175	Adenosine 5'-diphosphate	2.7.10.2	K11219
C00008	ENSMUSG00000031805	Adenosine 5'-diphosphate	2.7.10.2	K11218
C00008	ENSMUSG00000026596	Adenosine 5'-diphosphate	2.7.10.2	K08887
C00008	ENSMUSG00000027646	Adenosine 5'-diphosphate	2.7.10.2	K05704
C00008	ENSMUSG00000032899	Adenosine 5'-diphosphate	2.7.10.2	K17510
C00008	ENSMUSG00000003283	Adenosine 5'-diphosphate	2.7.10.2	K08893
C00008	ENSMUSG00000028874	Adenosine 5'-diphosphate	2.7.10.2	K08891
C00008	ENSMUSG00000031377	Adenosine 5'-diphosphate	2.7.10.2	K08896
C00008	ENSMUSG00000019779	Adenosine 5'-diphosphate	2.7.10.2	K08892
C00008	ENSMUSG00000050271	Adenosine 5'-diphosphate	2.7.10.2	K17537
C00008	ENSMUSG00000020395	Adenosine 5'-diphosphate	2.7.10.2	K07363
C00008	ENSMUSG00000027579	Adenosine 5'-diphosphate	2.7.10.2	K08895
C00008	ENSMUSG00000024789	Adenosine 5'-diphosphate	2.7.10.2	K04447
C00008	ENSMUSG00000026117	Adenosine 5'-diphosphate	2.7.10.2	K07360
C00008	ENSMUSG00000021385	Adenosine 5'-diphosphate	2.7.1.158	K10572
C00008	ENSMUSG00000028126	Adenosine 5'-diphosphate	2.7.1.68	K00889
C00008	ENSMUSG00000024867	Adenosine 5'-diphosphate	2.7.1.68	K00889
C00008	ENSMUSG00000033610	Adenosine 5'-diphosphate	2.7.1.33	K09680
C00008	ENSMUSG00000037514	Adenosine 5'-diphosphate	2.7.1.33	K09680
C00008	ENSMUSG00000028948	Adenosine 5'-diphosphate	2.7.1.-	K06947
C00008	ENSMUSG00000020464	Adenosine 5'-diphosphate	2.7.7.8	K00962
C00008	ENSMUSG00000014554	Adenosine 5'-diphosphate	2.7.1.113	K00904
C00008	ENSMUSG00000026447	Adenosine 5'-diphosphate	2.7.1.154	K00923
C00008	ENSMUSG00000000530	Adenosine 5'-diphosphate	2.7.11.30	K13594
C00008	ENSMUSG00000067336	Adenosine 5'-diphosphate	2.7.11.30	K04671
C00008	ENSMUSG00000021796	Adenosine 5'-diphosphate	2.7.11.30	K04673
C00008	ENSMUSG00000061393	Adenosine 5'-diphosphate	2.7.11.30	K13596
C00008	ENSMUSG00000032440	Adenosine 5'-diphosphate	2.7.11.30	K04388
C00008	ENSMUSG00000000532	Adenosine 5'-diphosphate	2.7.11.30	K13567
C00008	ENSMUSG00000050002	Adenosine 5'-diphosphate	2.7.1.12	K00851
C00008	ENSMUSG00000040648	Adenosine 5'-diphosphate	2.7.4.24	K13024
C00008	ENSMUSG00000033526	Adenosine 5'-diphosphate	2.7.4.24	K13024
C00008	ENSMUSG00000015085	Adenosine 5'-diphosphate	3.6.1.3	K01509
C00008	ENSMUSG00000023961	Adenosine 5'-diphosphate	3.6.1.29	K18424
C00008	ENSMUSG00000070738	Adenosine 5'-diphosphate	2.7.1.107	K00901
C00008	ENSMUSG00000022861	Adenosine 5'-diphosphate	2.7.1.107	K00901
C00008	ENSMUSG00000040479	Adenosine 5'-diphosphate	2.7.1.107	K00901
C00008	ENSMUSG00000062393	Adenosine 5'-diphosphate	2.7.1.107	K00901
C00008	ENSMUSG00000038665	Adenosine 5'-diphosphate	2.7.1.107	K00901
C00008	ENSMUSG00000000276	Adenosine 5'-diphosphate	2.7.1.107	K00901
C00008	ENSMUSG00000036095	Adenosine 5'-diphosphate	2.7.1.107	K00901
C00008	ENSMUSG00000025357	Adenosine 5'-diphosphate	2.7.1.107	K00901
C00008	ENSMUSG00000034731	Adenosine 5'-diphosphate	2.7.1.107	K00901
C00008	ENSMUSG00000031698	Adenosine 5'-diphosphate	2.7.11.18	K00907
C00008	ENSMUSG00000044951	Adenosine 5'-diphosphate	2.7.11.18	K00907
C00008	ENSMUSG00000022292	Adenosine 5'-diphosphate	1.17.4.1	K10808
C00008	ENSMUSG00000040675	Adenosine 5'-diphosphate	6.3.4.3	K13402
C00008	ENSMUSG00000005951	Adenosine 5'-diphosphate	2.7.1.14	K11214
C00008	ENSMUSG00000015599	Adenosine 5'-diphosphate	2.7.11.26	K08815
C00008	ENSMUSG00000000628	Adenosine 5'-diphosphate	2.7.1.1	K00844
C00008	ENSMUSG00000025877	Adenosine 5'-diphosphate	2.7.1.1	K00844
C00008	ENSMUSG00000030275	Adenosine 5'-diphosphate	2.7.1.82	K00894
C00008	ENSMUSG00000070644	Adenosine 5'-diphosphate	2.7.1.82	K00894
C00008	ENSMUSG00000055923	Adenosine 5'-diphosphate	6.2.1.-	K00142
C00008	ENSMUSG00000059316	Adenosine 5'-diphosphate	6.2.1.-	K08745
C00008	ENSMUSG00000031808	Adenosine 5'-diphosphate	6.2.1.-	K08745
C00008	ENSMUSG00000048120	Adenosine 5'-diphosphate	3.6.1.5	K01510
C00008	ENSMUSG00000029366	Adenosine 5'-diphosphate	2.7.1.74	K00893
C00008	ENSMUSG00000078816	Adenosine 5'-diphosphate	2.7.11.13	K19663
C00008	ENSMUSG00000002688	Adenosine 5'-diphosphate	2.7.11.13	K06070
C00008	ENSMUSG00000041187	Adenosine 5'-diphosphate	2.7.11.13	K06070
C00008	ENSMUSG00000050965	Adenosine 5'-diphosphate	2.7.11.13	K02677
C00008	ENSMUSG00000057672	Adenosine 5'-diphosphate	2.7.11.13	K06071
C00008	ENSMUSG00000024070	Adenosine 5'-diphosphate	2.7.11.13	K06070
C00008	ENSMUSG00000037643	Adenosine 5'-diphosphate	2.7.11.13	K06069
C00008	ENSMUSG00000026558	Adenosine 5'-diphosphate	2.7.1.48	K00876
C00049	ENSMUSG00000076441	Aspartic acid	6.3.4.5	K01940
C00049	ENSMUSG00000031521	Aspartic acid	3.5.1.26	K01444
C00049	ENSMUSG00000074141	Aspartic acid	1.4.3.2	K03334
C00049	ENSMUSG00000024903	Aspartic acid	1.4.3.2	K03334
C00049	ENSMUSG00000069873	Aspartic acid	1.4.3.2	K03334
C00049	ENSMUSG00000038704	Aspartic acid	1.4.1.21	K06989
C00049	ENSMUSG00000029752	Aspartic acid	6.3.5.4	K01953
C00049	ENSMUSG00000026787	Aspartic acid	4.1.1.15	K01580
C00049	ENSMUSG00000025190	Aspartic acid	2.6.1.1	K14454
C00049	ENSMUSG00000015961	Aspartic acid	6.3.4.4	K01939
C00049	ENSMUSG00000020774	Aspartic acid	3.5.1.15	K01437
C00526	ENSMUSG00000035824	Ile-Pro	2.7.1.21	K00857
C00526	ENSMUSG00000026839	Ile-Pro	2.4.2.3	K00757
C00526	ENSMUSG00000020407	Ile-Pro	2.4.2.3	K00757
C00526	ENSMUSG00000115338	Ile-Pro	2.4.2.1	K03783
C00025	ENSMUSG00000009566	DL-Glutamic acid	6.3.2.17	K01930
C00025	ENSMUSG00000043943	DL-Glutamic acid	3.4.17.21	K01301
C00025	ENSMUSG00000026787	DL-Glutamic acid	4.1.1.15	K01580
C00025	ENSMUSG00000028633	DL-Glutamic acid	6.3.4.2	K01937
C00025	ENSMUSG00000031700	DL-Glutamic acid	2.6.1.2	K00814
C00025	ENSMUSG00000030871	DL-Glutamic acid	6.1.1.17	K01885
C00025	ENSMUSG00000020899	DL-Glutamic acid	6.3.5.3	K01952
C00025	ENSMUSG00000024640	DL-Glutamic acid	2.6.1.52	K00831
C00025	ENSMUSG00000040359	DL-Glutamic acid	2.3.2.-	K22755
C00025	ENSMUSG00000029798	DL-Glutamic acid	2.3.2.-	K22372
C00025	ENSMUSG00000030268	DL-Glutamic acid	2.6.1.42	K00826
C00025	ENSMUSG00000029246	DL-Glutamic acid	2.4.2.14	K00764
C00025	ENSMUSG00000031090	DL-Glutamic acid	6.3.5.1	K01950
C00025	ENSMUSG00000029752	DL-Glutamic acid	6.3.5.4	K01953
C00025	ENSMUSG00000026103	DL-Glutamic acid	3.5.1.2	K01425
C00025	ENSMUSG00000025190	DL-Glutamic acid	2.6.1.1	K14454
C00636	ENSMUSG00000022474	D-Mannose 1-phosphate	5.4.2.8	K17497
C00636	ENSMUSG00000070284	D-Mannose 1-phosphate	2.7.7.13	K00966
C00636	ENSMUSG00000022538	D-Mannose 1-phosphate	3.6.1.-	K14539
C00636	ENSMUSG00000059772	D-Mannose 1-phosphate	3.6.1.-	K15078
C00636	ENSMUSG00000022360	D-Mannose 1-phosphate	3.6.1.-	K22531
C00636	ENSMUSG00000013662	D-Mannose 1-phosphate	3.6.1.-	K22530
C00636	ENSMUSG00000031767	D-Mannose 1-phosphate	3.6.1.-	K17879
C00636	ENSMUSG00000074797	D-Mannose 1-phosphate	3.6.1.-	K01519
C08323	ENSMUSG00000025287	Nervonic acid	3.1.2.-	K17361
C08323	ENSMUSG00000043487	Nervonic acid	3.1.2.-	K11993
C08323	ENSMUSG00000034853	Nervonic acid	3.1.2.-	K12417
C06427	ENSMUSG00000044788	Linolenic acid	1.14.19.-	K12419
C06427	ENSMUSG00000024664	Linolenic acid	1.14.19.-	K10225
C06427	ENSMUSG00000050211	Linolenic acid	3.1.1.4	K16342
C06427	ENSMUSG00000098488	Linolenic acid	3.1.1.4	K16342
C06427	ENSMUSG00000033847	Linolenic acid	3.1.1.4	K16342
C06427	ENSMUSG00000056220	Linolenic acid	3.1.1.4	K16342
C06427	ENSMUSG00000027999	Linolenic acid	3.1.1.4	K01047
C06427	ENSMUSG00000028145	Linolenic acid	3.1.2.2	K16339
C06427	ENSMUSG00000021226	Linolenic acid	3.1.2.2	K01068
C06427	ENSMUSG00000072949	Linolenic acid	3.1.2.2	K01068
C00208	ENSMUSG00000025579	D-Maltose	3.2.1.20	K12316
C00208	ENSMUSG00000062646	D-Maltose	3.2.1.20	K12317
C00208	ENSMUSG00000074264	D-Maltose	3.2.1.1	K01176
C01530	ENSMUSG00000028145	Octadecanoic acid	3.1.2.2	K16339
C01530	ENSMUSG00000021226	Octadecanoic acid	3.1.2.2	K01068
C01530	ENSMUSG00000072949	Octadecanoic acid	3.1.2.2	K01068
C00864	ENSMUSG00000029413	Pantothenate	3.5.1.-	K13720
C00864	ENSMUSG00000025486	Pantothenate	3.5.1.-	K11413
C00864	ENSMUSG00000030760	Pantothenate	3.5.1.-	K04711
C00864	ENSMUSG00000020063	Pantothenate	3.5.1.-	K11411
C00864	ENSMUSG00000015149	Pantothenate	3.5.1.-	K11412
C00864	ENSMUSG00000054021	Pantothenate	3.5.1.-	K11415
C00864	ENSMUSG00000033610	Pantothenate	2.7.1.33	K09680
C00864	ENSMUSG00000037514	Pantothenate	2.7.1.33	K09680
C00864	ENSMUSG00000020010	Pantothenate	3.5.1.92	K08069
C00712	ENSMUSG00000028145	Oleic acid	3.1.2.2	K16339
C00712	ENSMUSG00000021226	Oleic acid	3.1.2.2	K01068
C00712	ENSMUSG00000072949	Oleic acid	3.1.2.2	K01068
C00137	ENSMUSG00000024525	Myo-inositol	3.1.3.25	K01092
C00137	ENSMUSG00000031266	Myo-inositol	3.2.1.22	K01189
C00073	ENSMUSG00000042032	L-methionine	2.5.1.6	K00789
C00073	ENSMUSG00000021311	L-methionine	2.1.1.13	K00548
C00073	ENSMUSG00000006191	L-methionine	2.8.4.5	K15865
C00073	ENSMUSG00000074141	L-methionine	1.4.3.2	K03334
C00073	ENSMUSG00000024903	L-methionine	1.4.3.2	K03334
C00073	ENSMUSG00000069873	L-methionine	1.4.3.2	K03334
C00073	ENSMUSG00000056310	L-methionine	4.1.3.44	K15449
C00073	ENSMUSG00000115219	L-methionine	2.1.1.-	K22857
C00073	ENSMUSG00000028706	L-methionine	2.1.1.-	K21970
C00073	ENSMUSG00000039958	L-methionine	2.1.1.-	K22843
C00073	ENSMUSG00000022721	L-methionine	2.1.1.-	K15332
C00073	ENSMUSG00000028233	L-methionine	2.1.1.-	K14292
C00073	ENSMUSG00000029726	L-methionine	2.1.1.-	K15190
C00073	ENSMUSG00000038046	L-methionine	2.1.1.-	K20095
C00073	ENSMUSG00000035456	L-methionine	2.1.1.-	K20797
C00073	ENSMUSG00000021891	L-methionine	2.1.1.-	K00599
C00073	ENSMUSG00000046865	L-methionine	2.1.1.-	K14563
C00073	ENSMUSG00000036983	L-methionine	2.1.1.-	K15266
C00073	ENSMUSG00000020706	L-methionine	2.1.1.-	K14857
C00073	ENSMUSG00000018405	L-methionine	2.1.1.-	K15507
